# Supplementary material for: Development of New Restorer Lines Carrying Some Restoring Fertility Genes with Flowering, Yield and Grains Quality Characteristics in Rice (Oryza sativa L.)
Source: MDPI journal article supplement (doi:10.3390/genes13030458), 2022-03-03
Supplement: s1 [file s1]

**Table S1.** Pollen and spikelet fertility of hybrid combinations developed by crossing between IR69625A and G 46A cytoplasmic male sterile lines with new restorer lines during the 2018 season.

| Traits<br>crosses | IR69625A                        |                                   | G 46A                           |                                   |
|-------------------|---------------------------------|-----------------------------------|---------------------------------|-----------------------------------|
|                   | <b>Pollen<br/>fertility (%)</b> | <b>Spikelet<br/>fertility (%)</b> | <b>Pollen<br/>fertility (%)</b> | <b>Spikelet<br/>fertility (%)</b> |
| NRL 63            | 95.45                           | 91.48                             | 97.27                           | 93.25                             |
| NRL 64            | 97.26                           | 92.11                             | 98.38                           | 94.63                             |
| NRL 65            | 89.23                           | 87.08                             | 96.95                           | 92.34                             |
| NRL 66            | 97.13                           | 92.3                              | 92.88                           | 88.93                             |
| NRL 67            | 96.71                           | 92.82                             | 97.02                           | 93.17                             |
| NRL 68            | 89.62                           | 88.04                             | 94.00                           | 90.11                             |
| NRL 69            | 90.82                           | 88.16                             | 92.23                           | 89.9                              |
| NRL 70            | 93.25                           | 91.88                             | 96.75                           | 91.95                             |
| NRL 71            | 92.83                           | 91.19                             | 97.27                           | 94.67                             |
| NRL 72            | 90.99                           | 88.44                             | 98.38                           | 94.61                             |
| NRL 73            | 97.25                           | 93.86                             | 96.95                           | 92.59                             |
| NRL 74            | 90.9                            | 88.68                             | 92.88                           | 89.83                             |
| NRL 26            | 95.16                           | 90.66                             | 92.89                           | 88.9                              |
| NRL 37            | 89.86                           | 87.66                             | 97.84                           | 92.68                             |
| NRL 52            | 92.14                           | 89.65                             | 97.70                           | 93.12                             |
| NRL 53            | 90.2                            | 87.35                             | 94.20                           | 91.5                              |
| NRL 54-2W         | 91.73                           | 89.65                             | 98.02                           | 92.46                             |
| NRL 58            | 90.83                           | 88.46                             | 96.68                           | 91.3                              |
| NRL 59            | 92.43                           | 87.76                             | 96.73                           | 92.64                             |
| NRL 55            | 94.76                           | 91.38                             | 98.11                           | 93.06                             |
| NRL 46            | 90.76                           | 87.64                             | 90.11                           | 88.87                             |
| NRL 62            | 98.07                           | 95.12                             | 91.55                           | 89.73                             |
| G 46A             | 0                               | 0                                 | 0                               | 0                                 |
| IR69625A          | 0                               | 0                                 | 0                               | 0                                 |
| 86945-L           | 97.99                           | 92.86                             | 96.25                           | 91.94                             |
| BG 33-5           | 95.45                           | 92.11                             | 97.26                           | 91.48                             |
| BG 34-8           | 97.13                           | 92.82                             | 96.71                           | 92.3                              |

|          |       |       |       |       |
|----------|-------|-------|-------|-------|
| Giza 178 | 96.42 | 91.28 | 95.81 | 91.32 |
|----------|-------|-------|-------|-------|

**Table S2:** Mean performances for no. of days to 50% heading (day), plant height (cm), number of panicles per plant, panicle length (cm), and number of spikelets per panicle of the studied genotypes during 2019 and 2020 growing season.

| Traits crosses | Days to heading |        | Plant height |        | No. Of Panicles/plant |       | Panicle length |       | No. of spikelets/panicle |       |
|----------------|-----------------|--------|--------------|--------|-----------------------|-------|----------------|-------|--------------------------|-------|
|                | 2019            | 2020   | 2019         | 2020   | 2019                  | 2020  | 2019           | 2020  | 2019                     | 2020  |
| NRL 63         | 102.07          | 102.70 | 118.73       | 119.87 | 14.5                  | 17.07 | 24.01          | 25.27 | 187.5                    | 192.6 |
| NRL 64         | 103.10          | 103.51 | 119.27       | 121.63 | 13.5                  | 15.73 | 23.05          | 23.15 | 181.9                    | 188   |
| NRL 65         | 102.33          | 102.47 | 120.60       | 123.47 | 14.5                  | 17.6  | 23.28          | 24.04 | 180.6                    | 186.8 |
| NRL 66         | 99.07           | 99.33  | 101.33       | 102.07 | 15.4                  | 18.72 | 25.4           | 25.56 | 187.9                    | 206.9 |
| NRL 67         | 89.50           | 90.67  | 98.00        | 98.73  | 16.7                  | 15.9  | 24.2           | 24.58 | 180.6                    | 188.3 |
| NRL 68         | 89.53           | 90.00  | 80.13        | 81.20  | 16.4                  | 16.8  | 21.34          | 20.3  | 120.6                    | 114.7 |
| NRL 69         | 90.47           | 91.00  | 82.57        | 83.73  | 18.4                  | 18.87 | 20.88          | 19.93 | 110.3                    | 115.5 |
| NRL 70         | 94.83           | 95.67  | 79.47        | 80.60  | 16.7                  | 17.27 | 20.48          | 19.62 | 120                      | 115.5 |
| NRL 71         | 93.20           | 94.00  | 80.63        | 81.40  | 18.4                  | 19.2  | 21             | 20.12 | 128.6                    | 124   |
| NRL 72         | 92.50           | 93.33  | 79.87        | 81.00  | 16.6                  | 17.2  | 21.13          | 20.64 | 127.7                    | 122.9 |
| NRL 73         | 86.10           | 87.23  | 79.67        | 80.50  | 18.4                  | 17.37 | 18.61          | 20.05 | 142.3                    | 149.1 |
| NRL 74         | 85.83           | 86.47  | 81.20        | 81.90  | 22.9                  | 21.5  | 18.87          | 19.73 | 141.2                    | 148.4 |
| NRL 26         | 95.60           | 96.83  | 118.17       | 119.50 | 17.2                  | 18.67 | 23.66          | 26.08 | 224                      | 237.4 |
| NRL 37         | 99.17           | 98.17  | 114.50       | 117.17 | 20.8                  | 19.33 | 27.48          | 26.28 | 250.2                    | 229.8 |
| NRL 52         | 68.30           | 68.00  | 96.00        | 98.33  | 13.5                  | 14    | 21.18          | 20.62 | 134.2                    | 132.5 |
| NRL 53         | 75.23           | 76.23  | 114.50       | 116.17 | 20.5                  | 19    | 24.06          | 24.75 | 188.2                    | 205.3 |
| NRL 54-2W      | 94.80           | 95.70  | 122.33       | 124.17 | 15.8                  | 16.67 | 26.16          | 26.75 | 222.8                    | 213.9 |
| NRL 58         | 99.43           | 98.50  | 124.00       | 122.33 | 17.7                  | 16.33 | 25.65          | 26.38 | 226.8                    | 215.6 |
| NRL 59         | 99.83           | 100.47 | 122.50       | 121.17 | 18.3                  | 16.33 | 24.5           | 24.24 | 187                      | 202.2 |
| NRL 55         | 100.67          | 101.50 | 125.67       | 123.93 | 17.3                  | 18.5  | 26.24          | 26.42 | 131.9                    | 145.8 |
| NRL 46         | 100.90          | 101.63 | 115.33       | 116.50 | 17.5                  | 18.17 | 25.66          | 24.88 | 170.5                    | 156.2 |
| NRL 62         | 100.50          | 99.80  | 117.67       | 116.00 | 20.7                  | 18.97 | 26.59          | 26.66 | 202.2                    | 186.4 |
| G46B           | 81.00           | 80.11  | 91.07        | 89.45  | 11.9                  | 12.12 | 20.93          | 22.53 | 175.3                    | 160.2 |
| IR69625B       | 100.80          | 100.30 | 100.40       | 102.27 | 15.5                  | 15.77 | 20.23          | 22.35 | 148.4                    | 140.9 |

|               |        |        |        |        |      |       |       |       |       |       |
|---------------|--------|--------|--------|--------|------|-------|-------|-------|-------|-------|
| IR79156B      | 103.93 | 104.73 | 109.57 | 110.73 | 16.3 | 15.83 | 24    | 25.13 | 204.8 | 212.5 |
| 86945-L       | 104.23 | 104.03 | 111.40 | 109.80 | 15.0 | 14.5  | 22.45 | 23.29 | 153.5 | 141.3 |
| BG 33-5       | 104.17 | 104.03 | 114.83 | 113.07 | 16.0 | 15.5  | 23.14 | 24.73 | 182.8 | 159.6 |
| BG 34-8       | 105.50 | 106.20 | 115.17 | 115.67 | 14.8 | 14.17 | 22.42 | 22.5  | 149.9 | 147.6 |
| Giza 178 (ck) | 100.77 | 100.83 | 91.00  | 91.03  | 12.6 | 14.13 | 22.03 | 23.71 | 154.2 | 170.2 |
| L.S.D 5%      | 0.99   | 1.00   | 3.62   | 4.55   | 2.4  | 2.27  | 1.05  | 1.16  | 12.49 | 10.73 |
| L.S.D 1%      | 1.32   | 1.33   | 4.82   | 6.06   | 3.2  | 3.03  | 1.4   | 1.55  | 16.63 | 14.28 |

**Table S3:** Mean performances for spikelet fertility (%), number of filled grains per panicle, panicle weight (g), 1000 grain weight (g), and grain yield per plant (g) of the studied genotypes during 2019 and 2020 growing season.

| Traits<br>crosses | Spikelet<br>fertility (%) |       | No. of filled<br>grains<br>/panicle |        | Panicle<br>weight |      | 1000- grain<br>weight |       | grain yield<br>(g/p) |       |
|-------------------|---------------------------|-------|-------------------------------------|--------|-------------------|------|-----------------------|-------|----------------------|-------|
|                   | 2019                      | 2020  | 2019                                | 2020   | 2019              | 2020 | 2019                  | 2020  | 2019                 | 2020  |
| NRL 63            | 90.17                     | 92.88 | 169.07                              | 178.90 | 4.33              | 5.17 | 24.77                 | 25.51 | 52.7                 | 56.52 |
| NRL 64            | 87.84                     | 90.18 | 159.80                              | 169.53 | 4.00              | 4.67 | 24.67                 | 26.39 | 44.13                | 48.14 |
| NRL 65            | 92.59                     | 95.44 | 167.27                              | 178.30 | 4.31              | 5.36 | 25.13                 | 27.04 | 45.01                | 47.98 |
| NRL 66            | 92.06                     | 91.28 | 172.93                              | 188.80 | 4.55              | 5.05 | 26.33                 | 27.09 | 51.32                | 54.02 |
| NRL 67            | 95.19                     | 96.08 | 171.80                              | 180.80 | 4.69              | 4.27 | 24.51                 | 25.30 | 42.36                | 45.6  |
| NRL 68            | 91.18                     | 92.44 | 109.93                              | 106.00 | 3.72              | 3.19 | 28.17                 | 27.43 | 40.41                | 42.95 |
| NRL 69            | 91.83                     | 91.86 | 101.33                              | 106.10 | 3.74              | 3.06 | 28.75                 | 28.23 | 49.54                | 49.76 |
| NRL 70            | 92.32                     | 92.77 | 110.73                              | 107.13 | 3.53              | 3.05 | 28.56                 | 27.47 | 41.58                | 45.3  |
| NRL 71            | 92.92                     | 93.69 | 119.50                              | 116.20 | 3.68              | 3.15 | 28.71                 | 27.67 | 44.04                | 47.36 |
| NRL 72            | 95.29                     | 96.90 | 121.77                              | 119.17 | 4.04              | 3.45 | 29.06                 | 28.33 | 38.38                | 41.36 |
| NRL 73            | 94.32                     | 93.26 | 134.47                              | 139.17 | 3.62              | 4.11 | 26.86                 | 27.95 | 27.6                 | 32.33 |
| NRL 74            | 95.00                     | 95.55 | 134.27                              | 141.80 | 3.49              | 4.10 | 26.59                 | 27.73 | 35.86                | 39.79 |
| NRL 26            | 92.29                     | 95.03 | 206.63                              | 225.60 | 6.21              | 6.46 | 26.97                 | 26.96 | 38.20                | 41.00 |
| NRL 37            | 94.80                     | 92.02 | 237.17                              | 211.43 | 6.94              | 6.48 | 25.03                 | 24.23 | 46.05                | 45.16 |
| NRL 52            | 96.87                     | 97.13 | 129.93                              | 128.67 | 3.83              | 3.52 | 29.2                  | 28.93 | 38.47                | 41.03 |
| NRL 53            | 90.36                     | 93.46 | 169.93                              | 191.83 | 5.17              | 5.7  | 28.47                 | 28.73 | 45.43                | 47.37 |

|               |       |       |        |        |      |      |       |       |       |       |
|---------------|-------|-------|--------|--------|------|------|-------|-------|-------|-------|
| NRL 54-2W     | 91.87 | 92.35 | 204.60 | 197.47 | 6.94 | 7.08 | 27.52 | 28.2  | 46.94 | 49.57 |
| NRL 58        | 88.10 | 90.35 | 199.73 | 194.77 | 6.30 | 5.88 | 27.88 | 28.23 | 36.83 | 40.09 |
| NRL 59        | 87.00 | 91.20 | 162.73 | 184.43 | 4.84 | 5.08 | 25.83 | 25.6  | 56.82 | 60.23 |
| NRL 55        | 88.03 | 92.46 | 116.07 | 134.77 | 4.28 | 4.48 | 32.27 | 32.02 | 55.43 | 58.55 |
| NRL 46        | 90.74 | 92.10 | 154.73 | 143.90 | 5.28 | 5.02 | 29.13 | 30.16 | 48.84 | 51.83 |
| NRL 62        | 91.49 | 94.49 | 184.93 | 176.10 | 5.92 | 5.61 | 27.23 | 27.9  | 53.80 | 56.97 |
| G46B          | 88.37 | 90.72 | 154.97 | 145.33 | 4.10 | 3.42 | 24.4  | 24.43 | 30.50 | 34.10 |
| IR69625B      | 90.61 | 91.40 | 134.43 | 128.80 | 4.02 | 3.80 | 23.99 | 24.57 | 37.27 | 39.52 |
| IR79156B      | 90.16 | 90.72 | 184.67 | 192.70 | 3.81 | 3.69 | 21.13 | 21.27 | 35.74 | 38.47 |
| 86945-L       | 89.68 | 91.37 | 137.60 | 129.03 | 3.37 | 4.07 | 25.26 | 26.38 | 36.09 | 39.40 |
| BG 33-5       | 91.70 | 94.06 | 167.60 | 150.13 | 3.88 | 5.21 | 26.14 | 26.64 | 32.67 | 35.35 |
| BG 34-8       | 88.57 | 90.24 | 132.77 | 133.20 | 3.82 | 3.79 | 26.74 | 27.21 | 31.43 | 34.11 |
| Giza 178 (ck) | 91.61 | 91.68 | 141.23 | 156.00 | 2.82 | 3.42 | 21.3  | 20.46 | 36.83 | 39.17 |
| L.S.D 5%      | 2.40  | 1.58  | 12.14  | 9.95   | 0.48 | 0.54 | 0.69  | 0.60  | 4.58  | 4.10  |
| L.S.D 1%      | 3.20  | 2.11  | 16.16  | 13.25  | 0.64 | 0.72 | 0.92  | 0.79  | 6.1   | 5.45  |

**Table S4:** Mean performances for floral traits of the studied genotypes during 2019 and 2020 growing season.

| Traits crosses | Anther length (mm) |      | Anther breadth (mm) |      | Filament length (mm) |      | Duration of floret opening (min) |        |
|----------------|--------------------|------|---------------------|------|----------------------|------|----------------------------------|--------|
|                | 2019               | 2020 | 2019                | 2020 | 2019                 | 2020 | 2019                             | 2020   |
| NRL 63         | 2.42               | 2.37 | 0.47                | 0.46 | 7.03                 | 7.17 | 128.64                           | 127.31 |
| NRL 64         | 2.01               | 1.97 | 0.45                | 0.43 | 6.96                 | 6.92 | 120.16                           | 118.77 |
| NRL 65         | 1.97               | 1.91 | 0.46                | 0.44 | 6.83                 | 6.77 | 114.33                           | 113.02 |
| NRL 66         | 2.12               | 2.07 | 0.53                | 0.51 | 7.47                 | 7.41 | 133.12                           | 131.68 |
| NRL 67         | 2.22               | 2.16 | 0.46                | 0.44 | 6.47                 | 6.40 | 131.23                           | 129.36 |
| NRL 68         | 2.30               | 2.25 | 0.42                | 0.41 | 6.47                 | 6.41 | 131.18                           | 129.32 |
| NRL 69         | 2.23               | 2.17 | 0.44                | 0.45 | 6.63                 | 6.53 | 118.24                           | 120.24 |
| NRL 70         | 2.14               | 2.09 | 0.44                | 0.45 | 6.27                 | 6.19 | 116.20                           | 114.54 |
| NRL 71         | 2.22               | 2.17 | 0.46                | 0.45 | 6.57                 | 6.47 | 130.48                           | 129.48 |
| NRL 72         | 2.39               | 2.34 | 0.46                | 0.44 | 6.83                 | 6.70 | 129.78                           | 128.83 |
| NRL 73         | 2.23               | 2.19 | 0.48                | 0.46 | 6.70                 | 6.58 | 129.39                           | 130.70 |

|               |      |      |      |      |      |      |        |        |
|---------------|------|------|------|------|------|------|--------|--------|
| NRL 74        | 2.34 | 2.28 | 0.46 | 0.47 | 6.70 | 6.59 | 130.14 | 131.49 |
| NRL 26        | 2.80 | 2.84 | 0.55 | 0.57 | 7.30 | 7.44 | 154.82 | 153.53 |
| NRL 37        | 2.75 | 2.78 | 0.54 | 0.54 | 7.20 | 7.29 | 153.07 | 152.03 |
| NRL 52        | 2.03 | 2.00 | 0.41 | 0.41 | 6.27 | 6.13 | 139.14 | 140.13 |
| NRL 53        | 2.13 | 2.07 | 0.44 | 0.44 | 6.13 | 5.97 | 137.61 | 138.88 |
| NRL 54-2W     | 2.92 | 2.95 | 0.59 | 0.60 | 7.60 | 7.70 | 157.72 | 156.60 |
| NRL 58        | 2.81 | 2.77 | 0.56 | 0.58 | 7.33 | 7.47 | 151.48 | 152.44 |
| NRL 59        | 2.74 | 2.71 | 0.55 | 0.54 | 7.17 | 7.03 | 152.62 | 153.82 |
| NRL 55        | 2.64 | 2.66 | 0.45 | 0.45 | 7.03 | 7.17 | 129.05 | 127.73 |
| NRL 46        | 2.72 | 2.76 | 0.43 | 0.42 | 7.13 | 7.03 | 128.88 | 128.04 |
| NRL 62        | 2.85 | 2.87 | 0.57 | 0.56 | 7.47 | 7.34 | 148.86 | 148.10 |
| G46B          | 1.80 | 1.83 | 0.34 | 0.35 | 6.30 | 6.24 | 154.32 | 152.82 |
| IR69625B      | 1.83 | 1.85 | 0.37 | 0.38 | 6.10 | 6.02 | 150.63 | 149.42 |
| IR79156B      | 1.91 | 1.94 | 0.31 | 0.33 | 6.40 | 6.37 | 144.56 | 143.33 |
| 86945-L       | 1.75 | 1.76 | 0.39 | 0.39 | 6.20 | 6.13 | 92.90  | 91.67  |
| BG 33-5       | 1.82 | 1.84 | 0.37 | 0.38 | 6.17 | 6.03 | 94.02  | 92.99  |
| BG 34-8       | 1.90 | 1.93 | 0.36 | 0.37 | 6.27 | 6.13 | 95.20  | 94.06  |
| Giza 178 (ck) | 1.78 | 1.79 | 0.41 | 0.42 | 4.30 | 4.20 | 76.39  | 77.53  |
| L.S.D 5%      | 0.29 | 0.29 | 0.03 | 0.03 | 0.56 | 0.57 | 5.04   | 4.42   |
| L.S.D 1%      | 0.38 | 0.38 | 0.04 | 0.04 | 0.75 | 0.75 | 6.71   | 5.88   |

**Table S5:** Mean performances for rice hulling (%), milling (%), and head rice percentage traits of the studied genotypes during the 2019 and 2020 growing season.

| Traits<br>crosses | Hulling (%) |       | Milling (%) |       | Head rice % |       |
|-------------------|-------------|-------|-------------|-------|-------------|-------|
|                   | 2019        | 2020  | 2019        | 2020  | 2019        | 2020  |
| NRL 63            | 77.8        | 78.56 | 66.93       | 70.32 | 40.06       | 41.47 |
| NRL 64            | 77.87       | 78.96 | 69          | 71.59 | 38.8        | 39.3  |
| NRL 65            | 79.07       | 79.38 | 68.4        | 73.01 | 43.07       | 46.23 |
| NRL 66            | 79.4        | 79.27 | 70.87       | 71.49 | 63.33       | 65.63 |
| NRL 67            | 79.04       | 79.79 | 71.49       | 70.69 | 68.4        | 67.78 |
| NRL 68            | 80.13       | 80.67 | 72.28       | 73.33 | 52.86       | 53.33 |
| NRL 69            | 78.92       | 79.27 | 69.5        | 70    | 40.65       | 41    |
| NRL 70            | 80.41       | 81    | 71.51       | 72.6  | 62.05       | 62.6  |
| NRL 71            | 79.86       | 80.53 | 70.09       | 71.2  | 48.61       | 49.2  |
| NRL 72            | 79.99       | 80.6  | 69.83       | 70.73 | 58.97       | 59.53 |
| NRL 73            | 79.24       | 79.98 | 72.71       | 71.57 | 51.67       | 52.66 |
| NRL 74            | 78.98       | 79.57 | 72.22       | 71.64 | 61.33       | 61.64 |
| NRL 26            | 81.33       | 81.88 | 71.09       | 71.44 | 51.55       | 52.51 |
| NRL 37            | 81.6        | 80.32 | 69.27       | 70.67 | 61.47       | 64.67 |
| NRL 52            | 82.4        | 83.33 | 72.03       | 70.86 | 67.67       | 68.67 |
| NRL 53            | 81.13       | 81.52 | 72.4        | 71.34 | 68.4        | 67.5  |
| NRL 54-2W         | 79.83       | 79.4  | 70.46       | 69.97 | 64.02       | 63.67 |
| NRL 58            | 81.33       | 81.67 | 70.33       | 69.46 | 56.68       | 55.86 |
| NRL 59            | 79.47       | 79.51 | 72.27       | 72.27 | 70.88       | 70.37 |
| NRL 55            | 81.6        | 81.38 | 75          | 74.18 | 67.33       | 67.1  |
| NRL 46            | 80.8        | 81.73 | 72.8        | 73.13 | 70.07       | 71    |
| NRL 62            | 81.8        | 80.34 | 71.93       | 72.28 | 64.39       | 65.77 |
| G46B              | 80.16       | 80.53 | 70.89       | 69.87 | 49.81       | 48.27 |
| IR69625B          | 80.25       | 79.67 | 72.67       | 70.82 | 60.77       | 58.34 |
| IR79156B          | 80.58       | 80.2  | 70.28       | 69.48 | 57.3        | 56.08 |
| 86945-L           | 79.17       | 80.38 | 69.8        | 70.87 | 59.07       | 58.15 |
| BG 33-5           | 79.64       | 80.63 | 71.37       | 70.93 | 56.34       | 55.28 |
| BG 34-8           | 79.67       | 80.43 | 71.7        | 71.72 | 63.2        | 62.08 |

|               |       |       |       |       |       |       |
|---------------|-------|-------|-------|-------|-------|-------|
| Giza 178 (ck) | 81.04 | 81.37 | 71.01 | 71.88 | 66.68 | 66.68 |
| L.S.D 5%      | 0.97  | 1.12  | 1.01  | 1.46  | 2.32  | 4.28  |
| L.S.D 1%      | 1.29  | 1.49  | 1.34  | 1.94  | 3.09  | 5.69  |

**Table S6:** Mean performances for resistance to blast disease and rice stem borer insect during the 2019 and 2020 growing season.

| Lines       | Blast disease |      | stem borer insect |      |
|-------------|---------------|------|-------------------|------|
|             | 2019          | 2020 | 2019              | 2020 |
| NRL 63      | R             | R    | R                 | R    |
| NRL 64      | R             | R    | R                 | R    |
| NRL 65      | R             | R    | R                 | R    |
| NRL 66      | R             | R    | R                 | R    |
| NRL 67      | R             | R    | R                 | R    |
| NRL 68      | R             | R    | R                 | R    |
| NRL 69      | R             | R    | R                 | R    |
| NRL 70      | R             | R    | R                 | R    |
| NRL 71      | R             | R    | R                 | R    |
| NRL 72      | R             | R    | R                 | R    |
| NRL 73      | R             | R    | R                 | R    |
| NRL 74      | R             | R    | R                 | R    |
| NRL 26      | R             | R    | R                 | R    |
| NRL 37      | R             | R    | R                 | R    |
| NRL 52      | R             | R    | R                 | R    |
| NRL 53      | R             | R    | R                 | R    |
| NRL – 54-2W | R             | R    | R                 | R    |
| NRL 58      | R             | R    | R                 | R    |
| NRL 59      | R             | R    | R                 | R    |
| NRL 55      | R             | R    | R                 | R    |
| NRL 46      | R             | R    | R                 | R    |
| NRL 62      | R             | R    | R                 | R    |
| G46A, B     | R             | R    | R                 | R    |
| IR69625A, B | R             | R    | R                 | R    |
| IR79156A, B | R             | R    | R                 | R    |

|               |   |   |    |    |
|---------------|---|---|----|----|
| 86945-L       | R | R | R  | R  |
| BG 33-5       | R | R | R  | R  |
| BG 34-8       | R | R | R  | R  |
| Giza 178 (ck) | R | R | MR | MR |

R : resistance  
MR : moderate resistance

**Table S7:** Estimates of the percentage of advantage over commercial variety and over better parent for days to heading, plant height, and no. of panicles/plant of studied genotypes during the 2019 and 2020 growing season.

| Traits<br>crosses | Days to heading      |         |                   |         | Plant height         |         |                   |         | No. Of Panicles/plant |         |                   |         |
|-------------------|----------------------|---------|-------------------|---------|----------------------|---------|-------------------|---------|-----------------------|---------|-------------------|---------|
|                   | Advantage over (B.P) |         | Advantage over Ck |         | Advantage over (B.P) |         | Advantage over Ck |         | Advantage over (B.P)  |         | Advantage over Ck |         |
|                   | 2019                 | 2020    | 2019              | 2020    | 2019                 | 2020    | 2019              | 2020    | 2019                  | 2020    | 2019              | 2020    |
| NRL 63            | -1.8**               | -1.3*   | 1.3*              | 1.9**   | 8.4**                | 9.2**   | 30.5**            | 31.7**  | -11.1 ns              | 7.8 ns  | 14.5 ns           | 20.8*   |
| NRL 64            | -0.8 ns              | -0.5 ns | 2.3**             | 2.7**   | 8.9**                | 10.8**  | 31.1**            | 33.6**  | -17.0*                | -0.6 ns | 6.9 ns            | 11.4 ns |
| NRL 65            | -1.5**               | -1.5**  | 1.6**             | 1.6**   | 10.1**               | 12.4**  | 32.5**            | 35.6**  | -10.7 ns              | 11.2 ns | 15.0 ns           | 24.6*   |
| NRL 66            | 22.3**               | 24.0**  | -1.7**            | -1.5*   | 11.4**               | 14.1**  | 11.4**            | 12.1**  | 21.6 ns               | 32.5**  | 21.6 ns           | 32.5**  |
| NRL 67            | 10.5**               | 13.2**  | -11.2**           | -10.1** | 7.7**                | 10.4**  | 7.7**             | 8.5**   | 31.9**                | 12.6 ns | 31.9**            | 12.6 ns |
| NRL 68            | 10.5**               | 12.3**  | -11.1**           | -10.7** | -12.0**              | -9.2**  | -11.9**           | -10.8** | 2.3 ns                | 8.4 ns  | 29.6**            | 18.9*   |
| NRL 69            | 11.7**               | 13.6**  | -10.2**           | -9.8**  | -9.3**               | -6.4*   | -9.3**            | -8.0**  | 14.8 ns               | 21.7*   | 45.4**            | 33.6**  |
| NRL 70            | 17.1**               | 19.4**  | -5.9**            | -5.1**  | -12.7**              | -9.9**  | -12.7**           | -11.5** | 4.6 ns                | 11.4 ns | 32.5**            | 22.2*   |
| NRL 71            | 15.1**               | 17.3**  | -7.5**            | -6.8**  | -11.5**              | -9.0**  | -11.4**           | -10.6** | 15.0 ns               | 23.9**  | 45.6**            | 35.9**  |
| NRL 72            | 14.2**               | 16.5**  | -8.2**            | -7.4**  | -12.3**              | -9.4**  | -12.2**           | -11.0** | 3.5 ns                | 11.0 ns | 31.1**            | 21.8*   |
| NRL 73            | 6.3**                | 8.9**   | -14.6**           | -13.5** | -12.5**              | -10.0** | -12.5**           | -11.6** | 15.0 ns               | 12.0 ns | 45.6**            | 22.9*   |
| NRL 74            | 6.0**                | 7.9**   | -14.8**           | -14.2** | -10.8**              | -8.4**  | -10.8**           | -10.0** | 43.3**                | 38.7**  | 81.5**            | 52.2**  |
| NRL 26            | 18.0**               | 20.9**  | -5.1**            | -4.0**  | 29.8**               | 33.6**  | 29.9**            | 31.3**  | 7.3 ns                | 20.4*   | 35.9**            | 32.1**  |
| NRL 37            | 22.4**               | 22.5**  | -1.6**            | -2.6**  | 25.7**               | 31.0**  | 25.8**            | 28.7**  | 30.2**                | 24.7**  | 64.9**            | 36.9**  |
| NRL 52            | -15.7**              | -15.1** | -32.2**           | -32.6** | 5.4*                 | 9.9**   | 5.5*              | 8.0**   | -10.0 ns              | -3.4 ns | 6.9 ns            | -0.9 ns |
| NRL 53            | -7.1**               | -4.8**  | -25.3**           | -24.4** | 25.7**               | 29.9**  | 25.8**            | 27.6**  | 36.7**                | 31.0**  | 62.3**            | 34.5**  |



|           |         |         |         |         |        |        |        |        |         |         |        |         |
|-----------|---------|---------|---------|---------|--------|--------|--------|--------|---------|---------|--------|---------|
| NRL 54-2W | 17.0**  | 19.5**  | -5.9**  | -5.1**  | 34.3** | 38.8** | 34.4** | 36.4** | 6.7 ns  | 17.6 ns | 25.3*  | 18.0 ns |
| NRL 58    | 22.8**  | 23.0**  | -1.3*   | -2.3**  | 36.2** | 36.8** | 36.3** | 34.4** | 19.1*   | 15.3 ns | 39.8** | 15.6 ns |
| NRL 59    | 23.3**  | 25.4**  | -0.9 ns | -0.4 ns | 34.5** | 35.5** | 34.6** | 33.1** | 23.6*   | 15.3 ns | 45.1** | 15.6 ns |
| NRL 55    | -0.1 ns | 1.2*    | -0.1 ns | 0.7 ns  | 25.2** | 21.2** | 38.1** | 36.1** | 12.1 ns | 17.3*   | 37.2** | 31.0**  |
| NRL 46    | 0.1 ns  | 1.3*    | 0.1 ns  | 0.8 ns  | 14.9** | 13.9** | 26.7** | 28.0** | 13.1 ns | 15.2 ns | 38.5** | 28.6**  |
| NRL 62    | -0.3 ns | -0.5 ns | -0.3 ns | -1.0 ns | 17.2** | 13.4** | 29.3** | 27.4** | 33.6**  | 20.2*   | 63.6** | 34.3**  |
| L.S.D 5%  | 1.148   | 1.153   | 1.148   | 1.153   | 4.18   | 5.26   | 4.18   | 5.26   | 2.74    | 2.62    | 2.74   | 2.62    |
| L.S.D 1%  | 1.528   | 1.535   | 1.528   | 1.535   | 5.57   | 7.00   | 5.57   | 7.00   | 3.65    | 3.49    | 3.65   | 3.49    |

\*\* : Highly significant at 1%      \* : Significant at 5%      ns : Non-significant      L.S.D. : The least significant difference

**Table S8:** Estimates of the percentage of advantage over commercial variety and over better parent for panicle length, no. of spikelets/panicle, and spikelet fertility percentage of studied genotypes during the 2019 and 2020 growing season.

| Traits<br>crosses | Panicle length       |         |                   |         | No. of spikelets/ panicle |         |                   |         | Spikelet fertility (%) |        |                   |        |
|-------------------|----------------------|---------|-------------------|---------|---------------------------|---------|-------------------|---------|------------------------|--------|-------------------|--------|
|                   | Advantage over (B.P) |         | Advantage over Ck |         | Advantage over (B.P)      |         | Advantage over Ck |         | Advantage over (B.P)   |        | Advantage over Ck |        |
|                   | 2019                 | 2020    | 2019              | 2020    | 2019                      | 2020    | 2019              | 2020    | 2019                   | 2020   | 2019              | 2020   |
| NRL 63            | 0.03 ns              | 0.6 ns  | 9.0**             | 6.6*    | -8.4*                     | -9.3**  | 21.6**            | 13.1**  | 0.01ns                 | 1.7ns  | -1.6ns            | 1.3ns  |
| NRL 64            | -4.0 ns              | -7.9**  | 4.6 ns            | -2.3 ns | -11.2**                   | -11.5** | 18.0**            | 10.4**  | -2.6ns                 | -1.3ns | -4.1**            | -1.6ns |
| NRL 65            | -3.0 ns              | -4.3 ns | 5.7*              | 1.4 ns  | -11.8**                   | -12.1** | 17.2**            | 9.8**   | 2.7ns                  | 4.5**  | 1.1ns             | 4.1**  |
| NRL 66            | 15.3**               | 7.8**   | 15.3**            | 7.8**   | 7.2 ns                    | 21.5**  | 21.9**            | 21.5**  | 0.5ns                  | -0.4ns | 0.5               | -0.4ns |
| NRL 67            | 9.9**                | 3.7 ns  | 9.9**             | 3.7 ns  | 3.0 ns                    | 10.6**  | 17.2**            | 10.6**  | 3.9*                   | 4.8**  | 3.9*              | 4.8**  |
| NRL 68            | -7.8**               | -17.9** | -3.1 ns           | -14.4** | -34.0**                   | -28.4** | -21.8**           | -32.6** | -0.6ns                 | -1.7ns | -0.5ns            | 0.8ns  |
| NRL 69            | -9.8**               | -19.4** | -5.2 ns           | -16.0** | -39.6**                   | -27.9** | -28.4**           | -32.1** | 0.1ns                  | -2.3*  | 0.2ns             | 0.2ns  |
| NRL 70            | -11.5**              | -20.7** | -7.1*             | -17.3** | -34.3**                   | -27.9** | -22.1**           | -32.1** | 0.7ns                  | -1.4ns | 0.8ns             | 1.2ns  |
| NRL 71            | -9.3**               | -18.7** | -4.7 ns           | -15.1** | -29.6**                   | -22.6** | -16.6**           | -27.2** | 1.3ns                  | -0.4ns | 1.4ns             | 2.2*   |
| NRL 72            | -8.7**               | -16.5** | -4.1 ns           | -12.9** | -30.1**                   | -23.3** | -17.2**           | -27.8** | 3.9*                   | 3.0**  | 4.0*              | 5.7**  |
| NRL 73            | -19.6**              | -18.9** | -15.5**           | -15.4** | -22.1**                   | -6.9 ns | -7.7 ns           | -12.4** | 2.9ns                  | -0.9ns | 3.0ns             | 1.7ns  |

|           |         |         |         |         |         |         |         |         |        |        |        |        |
|-----------|---------|---------|---------|---------|---------|---------|---------|---------|--------|--------|--------|--------|
| NRL 74    | -18.5** | -20.2** | -14.4** | -16.8** | -22.8** | -7.3 ns | -8.4 ns | -12.8** | 3.6*   | 1.6ns  | 3.7*   | 4.2**  |
| NRL 26    | 2.3 ns  | 5.4*    | 7.4**   | 10.0**  | 22.6**  | 48.2**  | 45.3**  | 39.5**  | 0.6ns  | 1.0ns  | 0.7ns  | 3.7**  |
| NRL 37    | 18.8**  | 6.3*    | 24.7**  | 10.8**  | 36.9**  | 43.4**  | 62.3**  | 35.0**  | 3.4*   | -2.2*  | 3.5*   | 0.4ns  |
| NRL 52    | -5.6*   | -11.5** | -3.9 ns | -13.0** | -23.5** | -17.3** | -12.9** | -22.2** | 8.0**  | 6.3**  | 5.7**  | 5.9**  |
| NRL 53    | 7.2*    | 6.3*    | 9.2**   | 4.4 ns  | 7.3 ns  | 28.1**  | 22.1**  | 20.6**  | 0.8ns  | 2.3*   | -1.4ns | 1.9ns  |
| NRL 54-2W | 16.7**  | 18.7**  | 18.7**  | 12.8**  | 27.1**  | 33.5**  | 44.5**  | 25.6**  | 3.7*   | 1.8ns  | 0.3ns  | 0.7ns  |
| NRL 58    | 14.4**  | 17.1**  | 16.4**  | 11.3**  | 29.4**  | 34.6**  | 47.1**  | 26.6**  | -0.5ns | -0.4ns | -3.8*  | -1.4ns |
| NRL 59    | 9.3**   | 7.6*    | 11.2**  | 2.2 ns  | 6.7 ns  | 26.2**  | 21.3**  | 18.8**  | -1.8ns | 0.5ns  | -5.0** | -0.5ns |
| NRL 55    | 17.0**  | 17.4**  | 19.1**  | 11.4**  | -12.0*  | -1.2 ns | -14.5** | -14.4** | -2.9ns | 1.2ns  | -3.9*  | 0.9ns  |
| NRL 46    | 14.4**  | 10.6**  | 16.5**  | 4.9 ns  | 13.7**  | 5.8 ns  | 10.6*   | -8.2*   | 0.1ns  | 0.8ns  | -1.0ns | 0.5ns  |
| NRL 62    | 18.6**  | 18.5**  | 20.7**  | 12.4**  | 34.9**  | 26.3**  | 31.2**  | 9.5*    | 1.0ns  | 3.4**  | -0.1ns | 3.1**  |
| L.S.D 5%  | 1.22    | 1.34    | 1.22    | 1.34    | 14.43   | 12.39   | 14.43   | 12.39   | 2.77   | 1.83   | 2.77   | 1.83   |
| L.S.D 1%  | 1.62    | 1.79    | 1.62    | 1.79    | 19.20   | 16.49   | 19.20   | 16.49   | 3.69   | 2.43   | 3.69   | 2.43   |

\*\* : Highly significant at 1%      \*: Significant at 5%      ns: Non-significant      L.S.D. : The least significant difference

**Table S9:** Estimates of the percentage of advantage over commercial variety and over better parent for No. of filled grains/panicle, panicle weight, and 1000-grain weight of studied genotypes during the 2019 and 2020 growing season.

| Traits<br>crosses | No. of filled grains/panicle |         |                   |         | Panicle weight       |         |                   |          | 1000- grain weight   |         |                   |        |
|-------------------|------------------------------|---------|-------------------|---------|----------------------|---------|-------------------|----------|----------------------|---------|-------------------|--------|
|                   | Advantage over (B.P)         |         | Advantage over Ck |         | Advantage over (B.P) |         | Advantage over Ck |          | Advantage over (B.P) |         | Advantage over Ck |        |
|                   | 2019                         | 2020    | 2019              | 2020    | 2019                 | 2020    | 2019              | 2020     | 2019                 | 2020    | 2019              | 2020   |
| NRL 63            | -8.4*                        | -7.2*   | 19.7**            | 14.7**  | 13.7 ns              | 27.0**  | 53.5**            | 51.4**   | -1.9 ns              | -3.3*   | 16.3**            | 24.7** |
| NRL 64            | -13.5**                      | -12.0** | 7.6 ns            | 8.7*    | 5.0 ns               | 14.6 ns | 41.7**            | 36.7**   | -2.3 ns              | 0.01 ns | 15.8**            | 28.9** |
| NRL 65            | -9.4*                        | -7.5*   | 18.4**            | 14.3**  | 13.0 ns              | 31.6**  | 52.5**            | 56.9**   | -0.5 ns              | 2.5 ns  | 18.0**            | 32.1** |
| NRL 66            | 11.6*                        | 21.0**  | 22.4**            | 21.0**  | 11.0 ns              | 47.8**  | 61.0**            | 47.9**   | 7.9**                | 10.9**  | 23.6**            | 32.4** |
| NRL 67            | 10.9*                        | 15.9**  | 21.6**            | 15.9**  | 14.6*                | 25.0**  | 66.2**            | 25.1**   | 0.5 ns               | 3.6*    | 15.1**            | 23.7** |
| NRL 68            | -34.4**                      | -29.4** | -22.2**           | -32.1** | -9.3 ns              | -38.7** | 31.6**            | -6.5 ns  | 7.8**                | 3.0*    | 32.3**            | 34.1** |
| NRL 69            | -39.5**                      | -29.3** | -28.3**           | -32.0** | -8.7 ns              | -41.3** | 32.5**            | -10.4 ns | 10.0**               | 6.0**   | 35.0**            | 38.0** |

|           |         |          |         |         |          |          |         |          |        |        |        |        |
|-----------|---------|----------|---------|---------|----------|----------|---------|----------|--------|--------|--------|--------|
| NRL 70    | -33.9** | -28.6**  | -21.6** | -31.4** | -13.8*   | -41.4**  | 25.0*   | -10.6 ns | 9.2**  | 3.1*   | 34.1** | 34.2** |
| NRL 71    | -28.7** | -22.6**  | -15.4** | -25.5** | -10.3 ns | -39.5**  | 30.2**  | -7.7 ns  | 9.8**  | 3.9**  | 34.8** | 35.2** |
| NRL 72    | -27.3** | -20.6 ** | -13.8** | -23.6** | -1.4 ns  | -33.9**  | 43.1**  | 0.9 ns   | 11.2** | 6.4**  | 36.4** | 38.5** |
| NRL 73    | -19.8** | -7.3ns   | -4.8 ns | -10.8** | -11.7 ns | -21.1**  | 28.1**  | 20.4*    | 2.7 ns | 4.9**  | 26.1** | 36.6** |
| NRL 74    | -19.9** | -5.6ns   | -4.9 ns | -9.1*   | -14.7*   | -21.4**  | 23.7*   | 20.0*    | 1.7 ns | 4.1**  | 24.9** | 35.5** |
| NRL 26    | 23.3**  | 50.3**   | 46.3**  | 44.6**  | 51.6**   | 23.9**   | 120.0** | 89.1**   | 3.2*   | 1.2 ns | 26.6** | 31.7** |
| NRL 37    | 41.5**  | 40.8**   | 67.9**  | 35.5**  | 69.4**   | 24.3**   | 145.8** | 89.7**   | -4.3** | -9.0** | 17.5** | 18.4** |
| NRL 52    | -16.2** | -11.5**  | -8.0ns  | -17.5** | -6.5 ns  | -13.6 ns | 35.7**  | 3.0 ns   | 15.6** | 9.7**  | 37.1** | 41.4** |
| NRL 53    | 9.7*    | 32.0**   | 20.3**  | 23.0**  | 26.2**   | 39.9**   | 83.1**  | 66.8**   | 12.7** | 8.9**  | 33.6** | 40.4** |
| NRL 54-2W | 32.0**  | 35.9**   | 44.9**  | 26.6**  | 69.4**   | 86.7**   | 145.8** | 107.3**  | 2.9 ns | 3.6**  | 29.2** | 37.8** |
| NRL 58    | 28.9**  | 34.0**   | 41.4**  | 24.9**  | 53.8**   | 55.0**   | 123.1** | 72.1**   | 4.3**  | 3.7**  | 30.9** | 38.0** |
| NRL 59    | 5.0 ns  | 26.9**   | 15.2**  | 18.2**  | 18.1**   | 33.9**   | 71.4**  | 48.7**   | -3.4*  | -5.9** | 21.3** | 25.1** |
| NRL 55    | -13.7*  | 1.2ns    | -17.8** | -13.6** | 6.5 ns   | 17.9*    | 51.6**  | 31.1**   | 20.7** | 17.7** | 51.5** | 56.5** |
| NRL 46    | 15.1**  | 8.0ns    | 9.6ns   | -7.8*   | 31.3**   | 32.1**   | 87.0**  | 46.9**   | 9.0**  | 10.8** | 36.8** | 47.4** |
| NRL 62    | 37.6**  | 32.2**   | 30.9**  | 12.9**  | 47.3**   | 47.6**   | 109.7** | 64.2**   | 1.9 ns | 2.5 ns | 27.9** | 36.3** |
| L.S.D 5%  | 14.02   | 11.49    | 14.02   | 11.49   | 0.55     | 0.62     | 0.55    | 0.62     | 0.80   | 0.69   | 0.80   | 0.69   |
| L.S.D 1%  | 18.66   | 15.30    | 18.66   | 15.30   | 0.74     | 0.83     | 0.74    | 0.83     | 1.06   | 0.92   | 1.06   | 0.92   |

**Table S10:** Estimates of the percentage of advantage over commercial variety and over better parent for grain yield, anther length, and anther breadth of studied genotypes during the 2019 and 2020 growing season.

|           |          |         |         |         |         |        |        |        |         |         |        |        |
|-----------|----------|---------|---------|---------|---------|--------|--------|--------|---------|---------|--------|--------|
| RL 63     | 46.0**   | 43.4**  | 43.1**  | 44.3**  | 26.66** | 22.55* | 36.1** | 32.6** | 22.41** | 16.10** | 16.4** | 8.7*   |
| NRL 64    | 22.3**   | 22.2**  | 19.8**  | 22.9**  | 5.2ns   | 1.7ns  | 13.1ns | 10.1ns | 17.2**  | 10.2*   | 11.5** | 3.2ns  |
| NRL 65    | 24.7**   | 21.8**  | 22.2**  | 22.5**  | 2.8ns   | -1.5ns | 10.5ns | 6.5ns  | 19.8**  | 12.7**  | 13.9** | 5.6ns  |
| NRL 66    | 39.3**   | 37.9**  | 39.3**  | 37.9**  | 17.6ns  | 13.1ns | 18.9*  | 15.5ns | 29.5**  | 22.2**  | 29.5** | 22.2** |
| NRL 67    | 15.0*    | 16.4**  | 15.0*   | 16.4**  | 23.1*   | 18.1ns | 24.5*  | 20.5*  | 12.3**  | 4.0ns   | 12.3** | 4.0ns  |
| NRL 68    | 23.7**   | 21.5**  | 9.7 ns  | 9.7 ns  | 26.8**  | 22.7*  | 29.4** | 25.9** | 12.5**  | 6.1ns   | 3.3ns  | -3.2ns |
| NRL 69    | 51.7**   | 40.8**  | 34.5**  | 27.0**  | 22.8*   | 18.0ns | 25.3** | 21.0*  | 17.0**  | 17.4**  | 7.4ns  | 7.1ns  |
| NRL 70    | 27.3**   | 28.2**  | 12.9 ns | 15.7*   | 17.8ns  | 14.0ns | 20.2*  | 16.9ns | 18.8**  | 18.3**  | 9.0*   | 7.9*   |
| NRL 71    | 34.8**   | 34.0**  | 19.6**  | 20.9**  | 22.4*   | 18.3*  | 24.9** | 21.4*  | 24.1**  | 18.3**  | 13.9** | 7.9*   |
| NRL 72    | 17.5*    | 17.0*   | 4.2 ns  | 5.6 ns  | 31.6**  | 27.4** | 34.3** | 30.7** | 22.3**  | 14.8**  | 12.3** | 4.8ns  |
| NRL 73    | -15.5 ns | -8.5 ns | -25.1** | -17.5** | 22.9*   | 19.1*  | 25.5** | 22.2*  | 29.5**  | 20.9**  | 18.9** | 10.3** |
| NRL 74    | 9.8 ns   | 12.6 ns | -2.6 ns | 1.6 ns  | 29.0**  | 24.3** | 31.6** | 27.6** | 22.3**  | 21.7**  | 12.3** | 11.1** |
| NRL 26    | 16.9*    | 16.0*   | 3.7 ns  | 4.7 ns  | 54.1**  | 54.8** | 57.3** | 58.8** | 47.3**  | 47.8**  | 35.2** | 34.9** |
| NRL 37    | 41.0**   | 27.8**  | 25.0**  | 15.3*   | 51.6**  | 51.4** | 54.7** | 55.3** | 45.5**  | 41.7**  | 33.6** | 29.4** |
| NRL 52    | 6.6 ns   | 4.1 ns  | 4.5 ns  | 4.8 ns  | 12.8ns  | 9.7ns  | 14.0ns | 11.9ns | 6.9ns   | 5.1ns   | 1.6ns  | -1.6ns |
| NRL 53    | 25.9**   | 20.2**  | 23.3**  | 20.9**  | 18.3ns  | 13.3ns | 19.7*  | 15.6ns | 12.9**  | 11.0**  | 7.4ns  | 4.0ns  |
| NRL 54-2W | 49.3**   | 45.3**  | 27.4**  | 26.6**  | 53.9**  | 52.9** | 64.2** | 64.6** | 63.3**  | 60.7**  | 45.9** | 42.9** |
| NRL 58    | 17.2*    | 17.5*   | 0.0 ns  | 2.4 ns  | 47.9**  | 43.6** | 57.9** | 54.6** | 55.0**  | 55.4**  | 38.5** | 38.1** |
| NRL 59    | 80.8**   | 76.6**  | 54.3**  | 53.8**  | 44.4**  | 40.7** | 54.1** | 51.4** | 51.4**  | 44.6**  | 35.2** | 28.6** |
| NRL 55    | 48.7**   | 48.1**  | 50.5**  | 49.5**  | 38.8**  | 38.1** | 48.1** | 48.6** | 21.6**  | 17.4**  | 10.7*  | 7.1ns  |
| NRL 46    | 31.0**   | 31.2**  | 32.6**  | 32.3**  | 43.3**  | 43.1** | 53.0** | 54.0** | 16.2**  | 9.6*    | 5.7ns  | 0.0ns  |
| NRL 62    | 44.3**   | 44.1**  | 46.1**  | 45.4**  | 49.8**  | 48.8** | 59.9** | 60.1** | 54.1**  | 45.2**  | 40.2** | 32.5** |
| L.S.D 5%  | 5.29     | 4.73    | 5.29    | 4.73    | 0.33    | 0.33   | 0.33   | 0.33   | 0.03    | 0.03    | 0.03   | 0.03   |
| L.S.D 1%  | 7.04     | 6.30    | 7.04    | 6.30    | 0.44    | 0.44   | 0.44   | 0.44   | 0.05    | 0.04    | 0.05   | 0.04   |

\*\* : Highly significant at 1%      \* : Significant at 5%      ns : Non-significant      L.S.D. : The least significant difference

**Table S11:** Estimates of the percentage of advantage over commercial variety and over better parent for filament length and duration of floret opening of studied genotypes during the 2019 and 2020 growing season.

| Traits<br>crosses | Filament length (mm) |        |                   |        | Duration of floret opening (min) |          |                   |         |
|-------------------|----------------------|--------|-------------------|--------|----------------------------------|----------|-------------------|---------|
|                   | Advantage over (B.P) |        | Advantage over Ck |        | Advantage over (B.P)             |          | Advantage over Ck |         |
|                   | 2019                 | 2020   | 2019              | 2020   | 2019                             | 2020     | 2019              | 2020    |
| RL 63             | 9.90ns               | 12.57* | 63.6**            | 70.6** | -11.01**                         | -11.17** | 68.4**            | 64.2**  |
| NRL 64            | 8.7ns                | 8.7ns  | 61.9**            | 64.8** | -16.9**                          | -17.1**  | 57.3**            | 53.2**  |
| NRL 65            | 6.8ns                | 6.3ns  | 58.9**            | 61.1** | -20.9**                          | -21.1**  | 49.7**            | 45.8**  |
| NRL 66            | 18.5**               | 18.7** | 73.6**            | 76.5** | -13.7**                          | -13.8**  | 74.3**            | 69.8**  |
| NRL 67            | 2.6ns                | 2.6ns  | 50.4**            | 52.5** | -15.0**                          | -15.4**  | 71.8**            | 66.9**  |
| NRL 68            | 2.6ns                | 2.7ns  | 50.4**            | 52.7** | -15.0**                          | -15.4**  | 71.7**            | 66.8**  |
| NRL 69            | 5.3ns                | 4.6ns  | 54.3**            | 55.5** | -23.4**                          | -21.3**  | 54.8**            | 55.1**  |
| NRL 70            | -0.5ns               | -0.9ns | 45.7**            | 47.4** | -24.7**                          | -25.1**  | 52.1**            | 47.7**  |
| NRL 71            | 4.2ns                | 3.6ns  | 52.7**            | 54.0** | -15.5**                          | -15.3**  | 70.8**            | 67.0**  |
| NRL 72            | 8.5ns                | 7.3ns  | 58.9**            | 59.5** | -15.9**                          | -15.7**  | 69.9**            | 66.2**  |
| NRL 73            | 6.3ns                | 5.4ns  | 55.8**            | 56.7** | -16.2**                          | -14.5**  | 69.4**            | 68.6**  |
| NRL 74            | 6.3ns                | 5.5ns  | 55.8**            | 56.8** | -15.7**                          | -14.0**  | 70.4**            | 69.6**  |
| NRL 26            | 15.9**               | 19.2** | 69.8**            | 77.1** | 0.3ns                            | 0.5ns    | 102.7**           | 98.0**  |
| NRL 37            | 14.3**               | 16.7** | 67.4**            | 73.5** | -0.8ns                           | -0.5ns   | 100.4**           | 96.1**  |
| NRL 52            | -0.5ns               | -1.8ns | 45.7**            | 46.0** | -9.8**                           | -8.3**   | 82.1**            | 80.7**  |
| NRL 53            | -2.6ns               | -4.4ns | 42.6**            | 42.1** | -10.8**                          | -9.1**   | 80.1**            | 79.1**  |
| NRL 54-2W         | 20.6**               | 23.4** | 76.7**            | 83.4** | 2.2ns                            | 2.5ns    | 106.5**           | 102.0** |
| NRL 58            | 16.4**               | 19.6** | 70.5**            | 77.8** | -1.8ns                           | -0.2ns   | 98.3**            | 96.6**  |
| NRL 59            | 13.8*                | 12.7*  | 66.7**            | 67.5** | -1.1ns                           | 0.7ns    | 99.8**            | 98.4**  |
| NRL 55            | 12.2*                | 16.8** | 63.6**            | 70.6** | -14.3**                          | -14.5**  | 68.9**            | 64.8**  |
| NRL 46            | 13.8*                | 14.7** | 65.9**            | 67.5** | -14.4**                          | -14.3**  | 68.7**            | 65.2**  |
| NRL 62            | 19.1**               | 19.7** | 73.6**            | 74.8** | -1.2ns                           | -0.9ns   | 94.9**            | 91.0**  |
| L.S.D 5%          | 0.65                 | 0.65   | 0.65              | 0.65   | 5.82                             | 5.10     | 5.82              | 5.10    |
| L.S.D 1%          | 0.87                 | 0.87   | 0.87              | 0.87   | 7.75                             | 6.79     | 7.75              | 6.79    |

\*\* : Highly significant at 1%

\* : Significant at 5%

ns : Non-significant L.S.D. : The least significant difference

**Table S12:** Estimates of the percentage of advantage over commercial variety and over better parent for some grain quality traits of studied genotypes during the 2019 and 2020 growing season.

| Traits<br>crosses | Hulling (%)          |         |                   |         | Milling (%)          |         |                   |         | Head rice %          |         |                   |         |
|-------------------|----------------------|---------|-------------------|---------|----------------------|---------|-------------------|---------|----------------------|---------|-------------------|---------|
|                   | Advantage over (B.P) |         | Advantage over Ck |         | Advantage over (B.P) |         | Advantage over Ck |         | Advantage over (B.P) |         | Advantage over Ck |         |
|                   | 2019                 | 2020    | 2019              | 2020    | 2019                 | 2020    | 2019              | 2020    | 2019                 | 2020    | 2019              | 2020    |
| RL 63             | -3.5**               | -2.3**  | -4.0**            | -3.5**  | -4.8**               | -0.8 ns | -5.7**            | -2.2 ns | -32.2**              | -28.7** | -39.9**           | -37.8** |
| NRL 64            | -3.4**               | -1.8*   | -3.9**            | -3.0**  | -1.8*                | 1.0 ns  | -2.8**            | -0.4 ns | -34.3**              | -32.4** | -41.8**           | -41.1** |
| NRL 65            | -1.9**               | -1.2 ns | -2.4**            | -2.4**  | -2.7**               | 3.0*    | -3.7**            | 1.6 ns  | -27.1**              | -20.5** | -35.4**           | -30.7** |
| NRL 66            | -2.0**               | -2.6**  | -2.0**            | -2.6**  | -0.2 ns              | -0.5 ns | -0.2 ns           | -0.5 ns | -5.0*                | -1.6 ns | -5.0*             | -1.6 ns |
| NRL 67            | -2.5**               | -1.9*   | -2.5**            | -1.9*   | 0.7 ns               | -1.7 ns | 0.7 ns            | -1.7 ns | 2.6 ns               | 1.6 ns  | 2.6 ns            | 1.6 ns  |
| NRL 68            | 0.04 ns              | 0.05 ns | -1.1 ns           | -0.9 ns | 1.3 ns               | 3.4**   | 1.8*              | 2.0 ns  | -6.2*                | -3.5 ns | -20.7**           | -20.0** |
| NRL 69            | -1.5*                | -1.7*   | -2.6**            | -2.6**  | -2.6**               | -1.3 ns | -2.1*             | -2.6*   | -27.9**              | -25.8** | -39.0**           | -38.5** |
| NRL 70            | 0.3 ns               | 0.5 ns  | -0.8 ns           | -0.5 ns | 0.2 ns               | 2.4 ns  | 0.7 ns            | 1.0 ns  | 10.1**               | 13.2**  | -6.9**            | -6.1 ns |
| NRL 71            | -0.4 ns              | -0.1 ns | -1.5*             | -1.0 ns | -1.8*                | 0.4 ns  | -1.3 ns           | -0.9 ns | -13.7**              | -11.0*  | -27.1**           | -26.2** |
| NRL 72            | -0.2 ns              | 0.04 ns | -1.3 ns           | -0.9 ns | -2.2*                | -0.3 ns | -1.7*             | -1.6 ns | 4.7 ns               | 7.7 ns  | -11.6**           | -10.7** |
| NRL 73            | -1.1 ns              | -0.8 ns | -2.2**            | -1.7*   | 1.9*                 | 0.9 ns  | 2.4**             | -0.4 ns | -8.3**               | -4.7 ns | -22.5**           | -21.0** |
| NRL 74            | -1.5*                | -1.3 ns | -2.5**            | -2.2**  | 1.2 ns               | 1.0 ns  | 1.7*              | -0.3 ns | 8.9**                | 11.5*   | -8.0**            | -7.6*   |
| NRL 26            | 1.5*                 | 1.6 ns  | 0.4 ns            | 0.6 ns  | -0.4 ns              | 0.7 ns  | 0.1 ns            | -0.6 ns | -8.5**               | -5.0 ns | -22.7**           | -21.3** |
| NRL 37            | 1.8*                 | -0.4 ns | 0.7 ns            | -1.3 ns | -2.9**               | -0.4 ns | -2.4**            | -1.7 ns | 9.1**                | 17.0**  | -7.8**            | -3.0 ns |
| NRL 52            | 2.8**                | 3.5**   | 1.7*              | 2.4**   | 1.6 ns               | 0.0 ns  | 1.4 ns            | -1.4 ns | 14.6**               | 18.1**  | 1.5 ns            | 3.0 ns  |
| NRL 53            | 1.2 ns               | 1.2 ns  | 0.1 ns            | 0.2 ns  | 2.1*                 | 0.7 ns  | 2.0*              | -0.7 ns | 15.8**               | 16.1**  | 2.6 ns            | 1.2 ns  |
| NRL 54-2W         | -0.4 ns              | -1.4 ns | -1.5*             | -2.4**  | -1.7*                | -2.4*   | -0.8 ns           | -2.7*   | 1.3 ns               | 2.6 ns  | -4.0 ns           | -4.5 ns |
| NRL 58            | 1.5*                 | 1.4 ns  | 0.4 ns            | 0.4 ns  | -1.9*                | -3.1**  | -1.0 ns           | -3.4**  | -10.3**              | -10.0*  | -15.0**           | -16.2** |
| NRL 59            | -0.9 ns              | -1.3 ns | -1.9**            | -2.3**  | 0.8 ns               | 0.8 ns  | 1.8*              | 0.5 ns  | 12.1**               | 13.3**  | 6.3**             | 5.5 ns  |
| NRL 55            | 1.7*                 | 1.2 ns  | 0.7 ns            | 0.01 ns | 3.2**                | 3.4**   | 5.6**             | 3.2**   | 6.5**                | 8.1*    | 1.0 ns            | 0.6 ns  |
| NRL 46            | 0.7 ns               | 1.6*    | -0.3 ns           | 0.4 ns  | 0.2 ns               | 2.0 ns  | 2.5**             | 1.7 ns  | 10.9**               | 14.4**  | 5.1*              | 6.5 ns  |
| NRL 62            | 1.9**                | -0.1 ns | 0.9 ns            | -1.3 ns | -1.0 ns              | 0.8 ns  | 1.3 ns            | 0.6 ns  | 1.9 ns               | 5.9 ns  | -3.4 ns           | -1.4 ns |
| L.S.D 5%          | 1.12                 | 1.29    | 1.12              | 1.29    | 1.16                 | 1.68    | 1.16              | 1.68    | 2.68                 | 4.94    | 2.68              | 4.94    |
| L.S.D 1%          | 1.49                 | 1.72    | 1.49              | 1.72    | 1.55                 | 2.24    | 1.55              | 2.24    | 3.56                 | 6.57    | 3.56              | 6.57    |

\*\* : Highly significant at 1%

\* : Significant at 5%

ns: Non-significant L.S.D. : The least significant difference
